# Supplementary material
Source: PubMed Central journal article supplement (PMC9077320)
Supplement: mmc1.pdf [file mmc1.pdf]

YMTHE, Volume 30

## **Supplemental Information**

**Suppression of Fli-1 protects  
against pericyte loss and cognitive  
deficits in Alzheimer's disease**

**Pengfei Li, Yan Wu, Eric D. Hamlett, Andrew J. Goodwin, Perry V. Halushka, Steven L. Carroll, Meng Liu, and Hongkuan Fan**

## **Supplemental Information**

### **Suppression of Fli-1 protects against pericyte loss and cognitive deficits in Alzheimer's disease**

Pengfei Li, Yan Wu, Eric D. Hamlett, Andrew J. Goodwin, Perry V. Halushka, Steven L. Carroll, Meng Liu, Hongkuan Fan

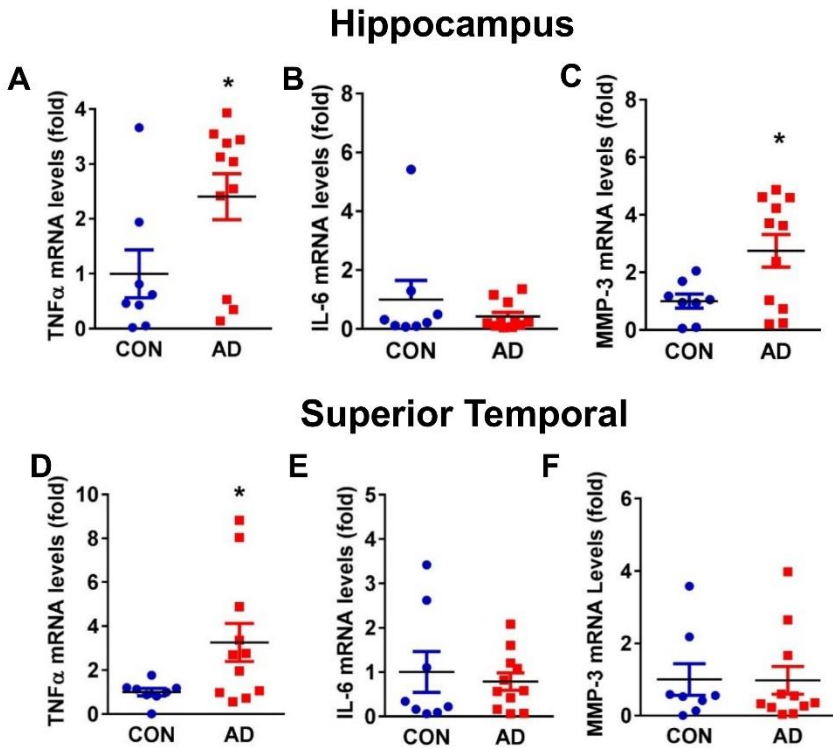

**Figure S1. Expression of *TNF $\alpha$* , *IL-6* and *MMP3* in AD patients.** RNAs were isolated from 100 mg brain hippocampal tissue or superior temporal tissue of human donors with AD (N = 11) and cognitively normal controls (N = 8). The expression levels of *TNF $\alpha$* , *IL-6* and *MMP3* were determined by RT-PCR in the (A-C) hippocampus and (D-F) superior temporal. Data are expressed as mean  $\pm$  standard error of the mean. \* $P < 0.05$  compared to CON group. CON: control; AD: Alzheimer's disease.

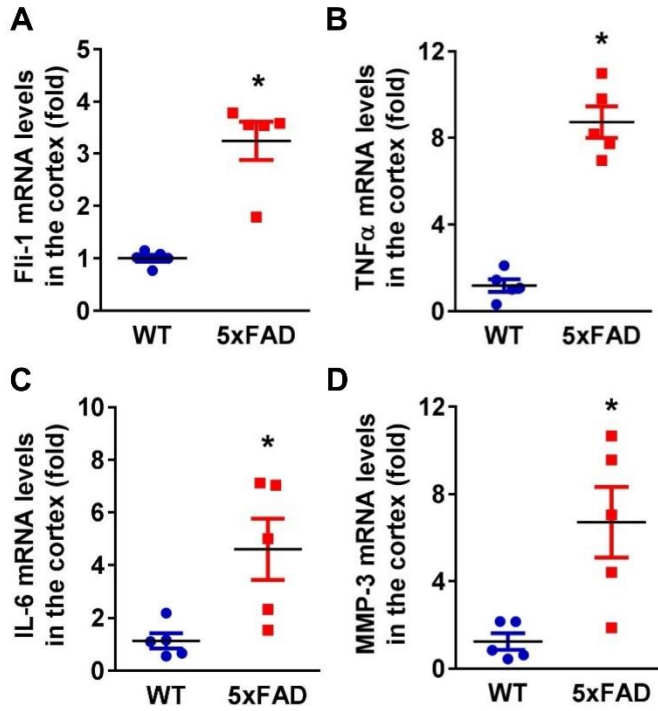

**Figure S2. Increased *Fli-1*, *TNF $\alpha$* , *IL-6* and *MMP3* in the cortex of 5xFAD mice.** The cortex was isolated from WT and 5xFAD mice at 6.5 months of age. (A) *Fli-1* mRNA levels were determined by RT-PCR. N=5 mice/group. Expression levels of (B) *TNF $\alpha$* , (C) *IL-6* and (D) *MMP3* were determined by RT-PCR. N=5 mice/group. Data are expressed as mean  $\pm$  standard error of the mean. \* $P < 0.05$  compared to WT group.

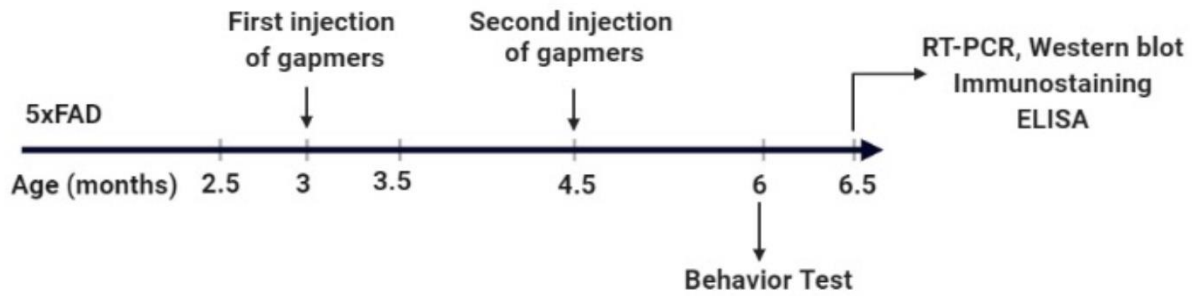

**Figure S3. The experimental design *in vivo*.** The *in vivo* experimental design including the timeline of intrahippocampal injection of Control or Fli-1 Gapmers, behavioral test, RT-PCR, western blot, immunostaining and ELISA.

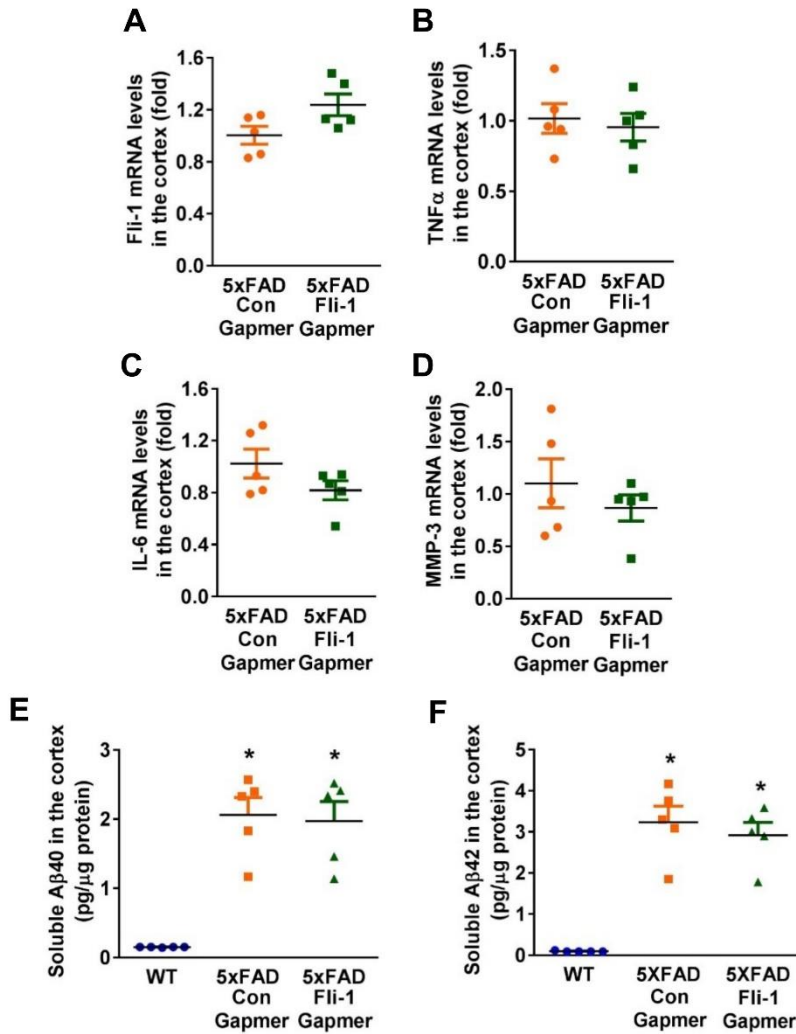

**Figure. S4. Intrahippocampal injection of Fli-1 Gapmer did not affect expression levels of *Fli-1*, *TNF $\alpha$* , *IL-6* and *MMP3*, and A $\beta$  levels in the cortex of 5xFAD mice.** Fli-1 or control Gapmers were injected into both sides of the hippocampus of 5xFAD mice at 3 and 4.5 months of age. The cortex was isolated from WT and 5xFAD mice treated with control or Fli-1 gapmers at 6.5 months of age. (A) *Fli-1*, (B) *TNF $\alpha$* , (C) *IL-6* and (D) *MMP3* levels were determined by RT-PCR. (E-F) Soluble human A $\beta$ 40 and A $\beta$ 42 levels in the cortex was detected by ELISA. N=5 mice/group. Data are expressed as mean  $\pm$  standard error of the mean. \* $P < 0.05$  compared to WT group.
